# Supplementary material
Source: publisher figshare collection journal article supplement (https://gsajournals.figshare.com/ndownloader/files/22801193)
Supplement: Supplementary file 1 [file 22801193]

**Table S2. List of wild-type *Caenorhabditis* strains tested for L1 IR-sensitivity**

| N2 strains | | |
| --- | --- | --- |
| Strain name | Origin | L1 IR response |
| N2 | Zetka laboratory | Sensitive |
| N2 | CGC | Sensitive |
| N2 | Roy laboratory | Resistant |
| N2 | Hekimi laboratory | Resistant |
| N2 | Andersen laboratory | Resistant |
| N2 | NBRP | Resistant |
| N2 | Zhen laboratory | Resistant |
| *C. elegans* wild-type isolates | | |
| Strain name | Origin | L1 IR response |
| QX1211 | San Francisco, California | Resistant |
| JU775 | Lisbon, Portugal | Resistant |
| CB4856 | Oahu, Hawaii | Resistant |
| DL238 | Hawaii, Hawaii | Resistant |
| MY16 | Mecklenbeck, Germany | Resistant |
| MY23 | Roxel, Germany | Resistant |
| EG4724 | Amares, Portugal | Resistant |
| JU258 | Ribeiro Frio, Madeira | Resistant |
| LKC34 | Madagascar | Resistant |
| JU1088 | Kakegawa, Japan | Resistant |
| ED3073 | Limuru, Kenya | Resistant |
| DL226 | Corvallis, Oregon | Resistant |
| AB4 | Adelaide, Australia | Resistant |
| JU1171 | Concepcion, Chile | Resistant |
| AB1 | Adelaide, Australia | Resistant |
| JU1652 | Montevideo, Uruguay | Resistant |
| JU1896 | Athens, Greece | Resistant |
| *C. briggsae* strains | | |
| Strain name | Origin | L1 IR response |
| VT847 | Hawaii, Hawaii | Resistant |
| PB800 | Dayton, Ohio | Resistant |
